# Supplementary material for: GSAE: an autoencoder with embedded gene-set nodes for genomics functional characterization
Source: PubMed Central journal article supplement (PMC6302374; doi:10.1186/s12918-018-0642-2), 2018-12-21

A

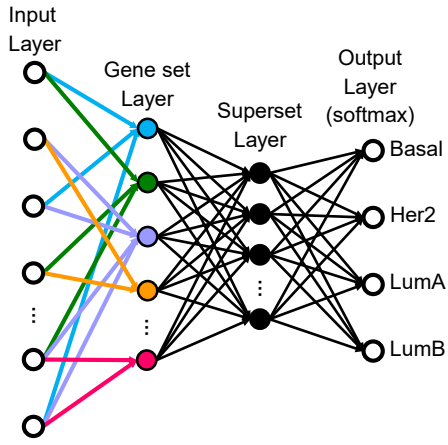

B

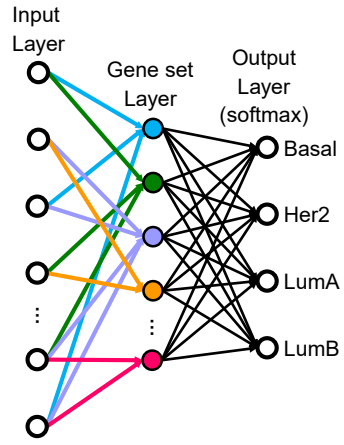

C

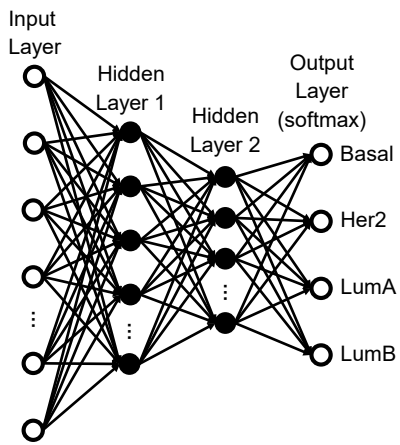

D

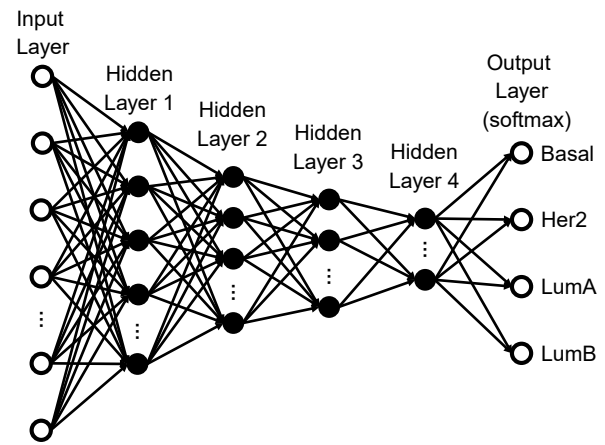

Supplement: 12918_2018_642_MOESM2_ESM.pdf [file 12918_2018_642_MOESM2_ESM.pdf]
